# Supplementary material
Source: PubMed Central journal article supplement (PMC3984913)
Supplement: NIHMS559221-supplement-supplemental_material.pdf [file NIHMS559221-supplement-supplemental_material.pdf]

## Online Data Supplement

.....

### **HDAC inhibition blunts ischemia/reperfusion injury by inducing cardiomyocyte autophagy**

Min Xie, MD, PhD<sup>a</sup>, Yongli Kong, MD<sup>a</sup>, Wei Tan, MD<sup>a</sup>, Herman May, BS<sup>a</sup>,  
Pavan K. Battiprolu, PhD<sup>a</sup>, Zully Pedrozo, PhD<sup>a</sup>, Zhao Wang, PhD<sup>a</sup>, Cyndi Morales, BS<sup>a</sup>,  
Xiang Luo, MD<sup>a</sup>, Geoffrey Cho, MD<sup>a</sup>, Nan Jiang, MS<sup>a</sup>, Michael E. Jessen, MD<sup>b</sup>,  
John J. Warner, MD<sup>a</sup>, Sergio Lavandero<sup>a,c</sup>, PhD, Thomas G. Gillette, PhD<sup>a</sup>,  
Aslan T. Turer, MD<sup>a</sup>, and Joseph A. Hill, MD, PhD<sup>a,d</sup>

Departments of <sup>a</sup>Internal Medicine (Cardiology), <sup>b</sup>Cardiovascular and Thoracic Surgery, <sup>c</sup>Centro Estudios Moleculares de la Célula, Facultad de Ciencias Químicas y Farmacéuticas & Facultad de Medicina, Universidad de Chile, Santiago, Chile, and <sup>d</sup>Department of Molecular Biology, University of Texas Southwestern Medical Center, Dallas, Texas

**Address correspondence to:**

Joseph A. Hill, MD, PhD  
Division of Cardiology  
University of Texas Southwestern Medical Center  
NB11.200  
6000 Harry Hines Boulevard  
Dallas, TX 75390-8573, USA  
[joseph.hill@utsouthwestern.edu](mailto:joseph.hill@utsouthwestern.edu)

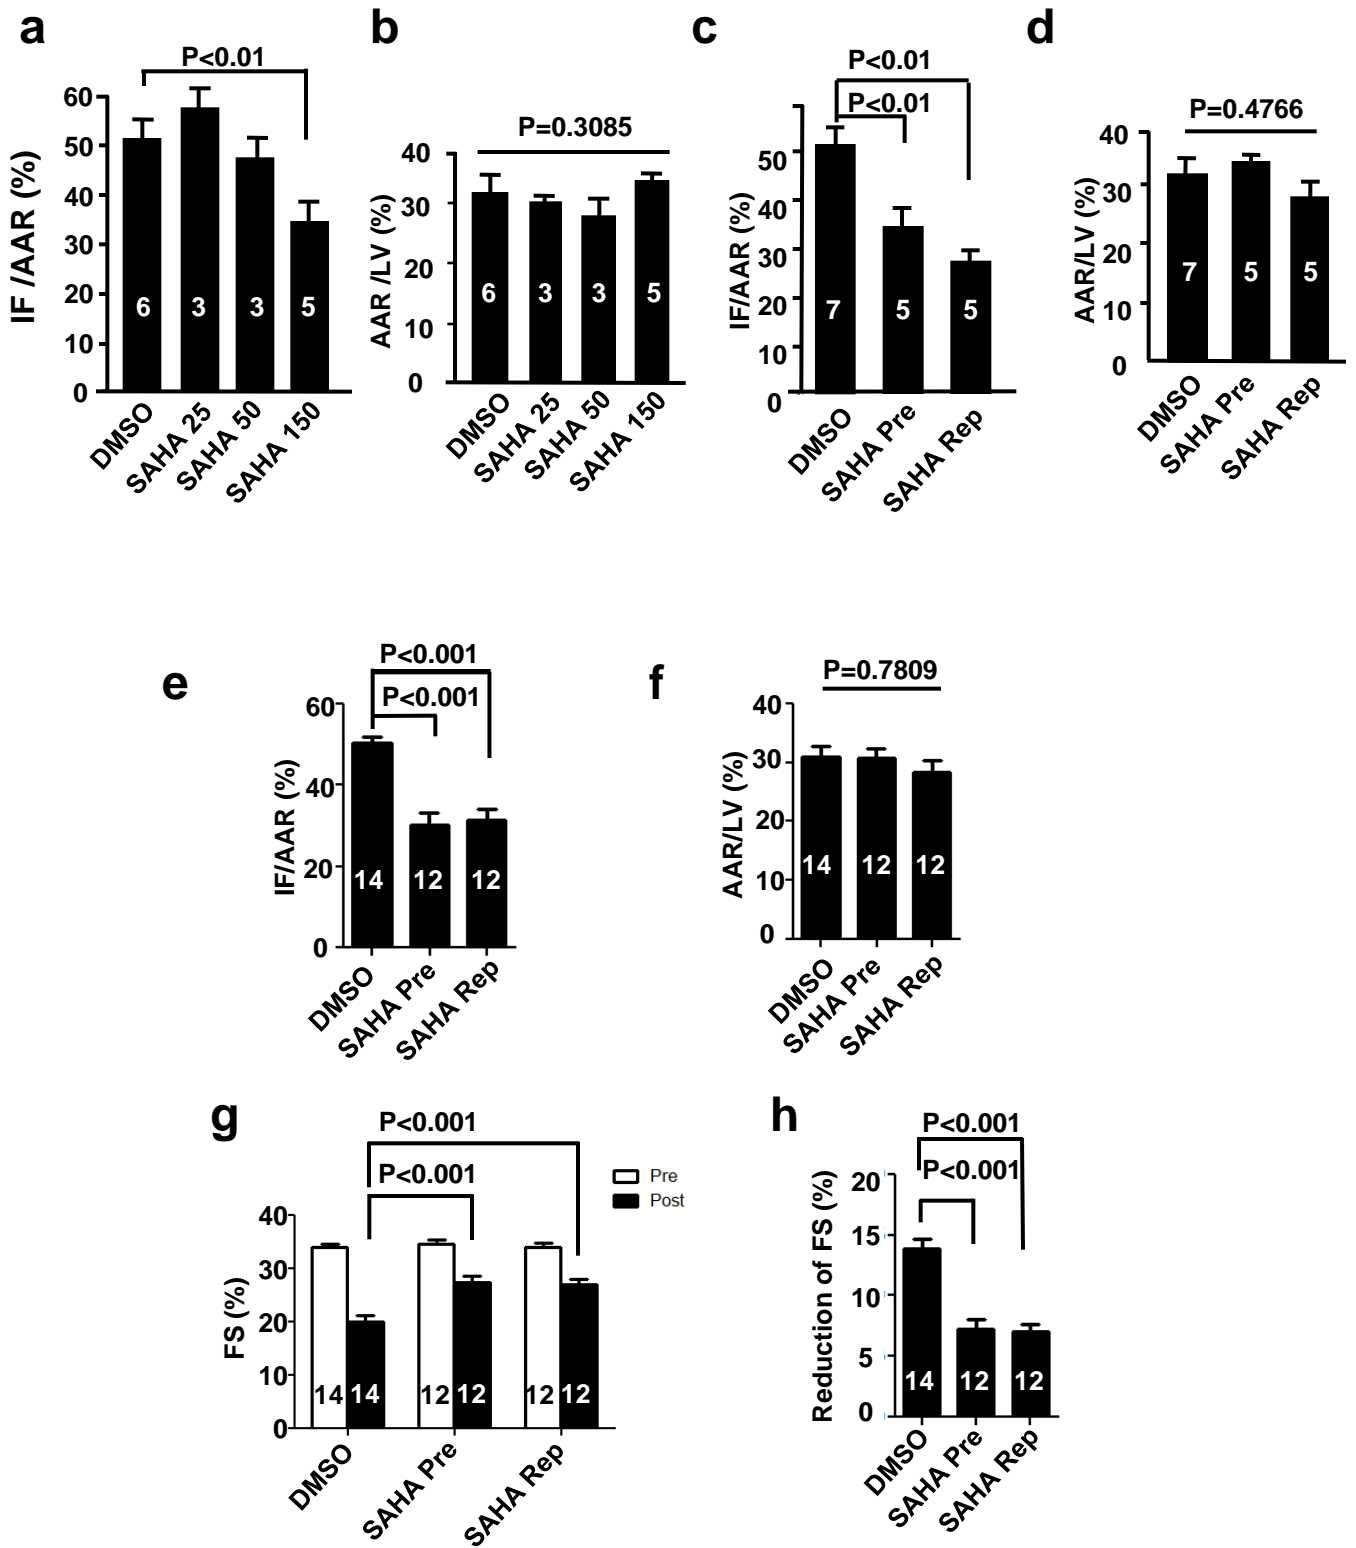

Supplemental Figure 1. SAHA reduces infarct size in rabbit I/R model

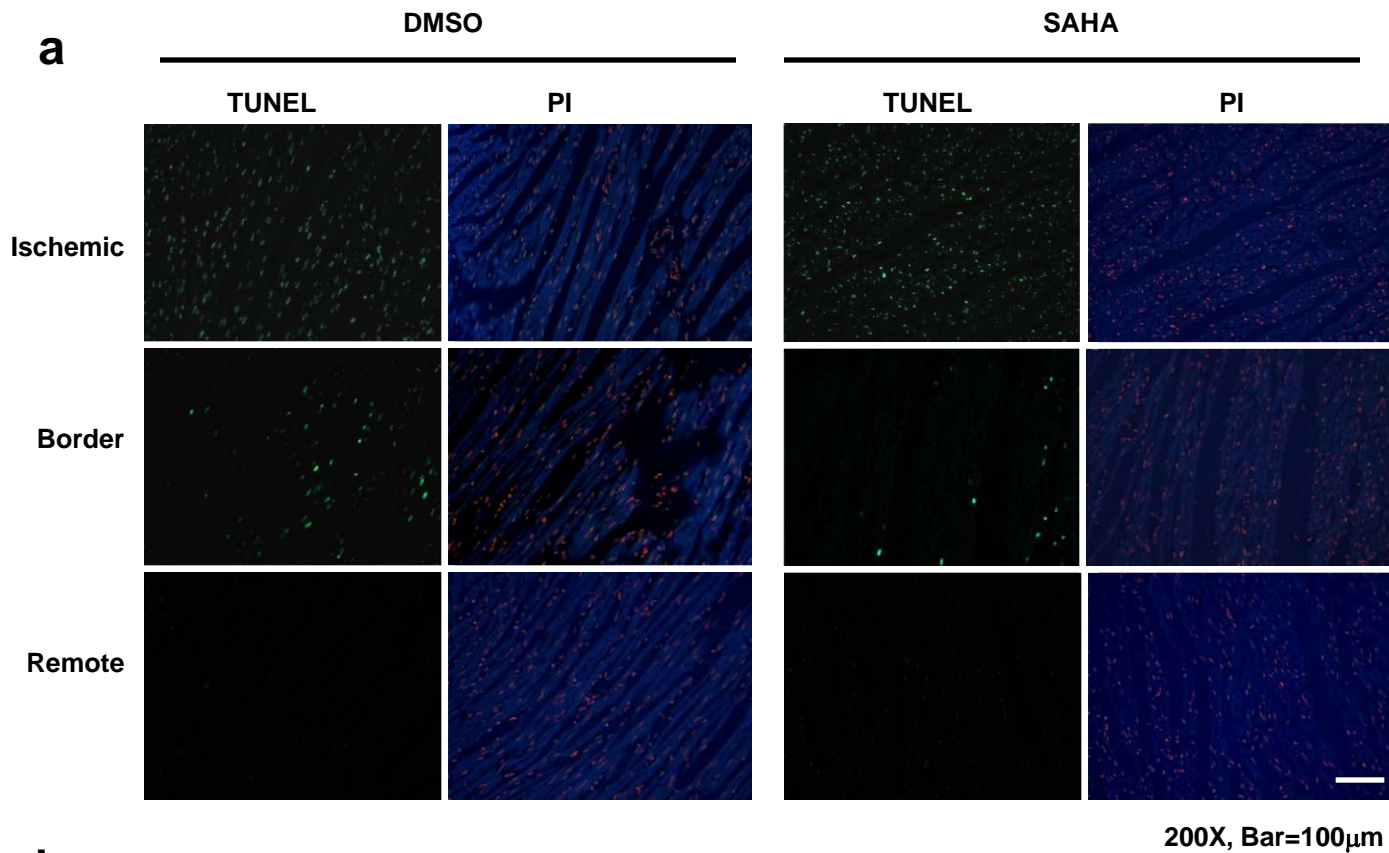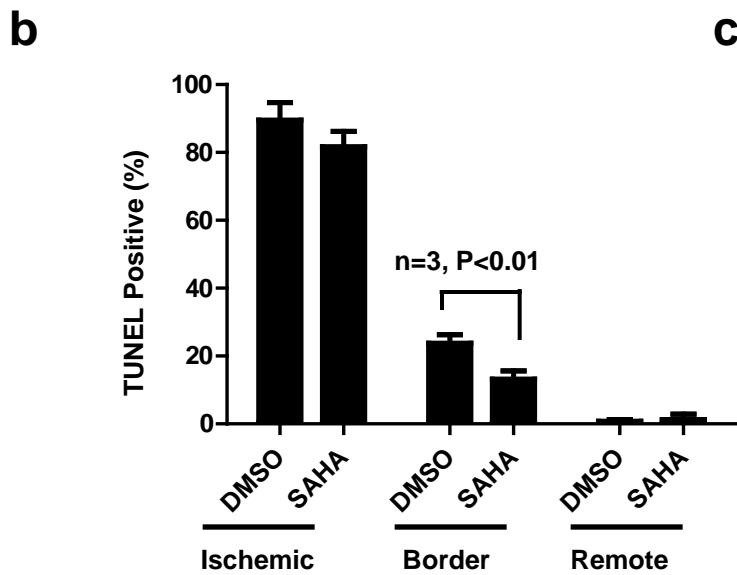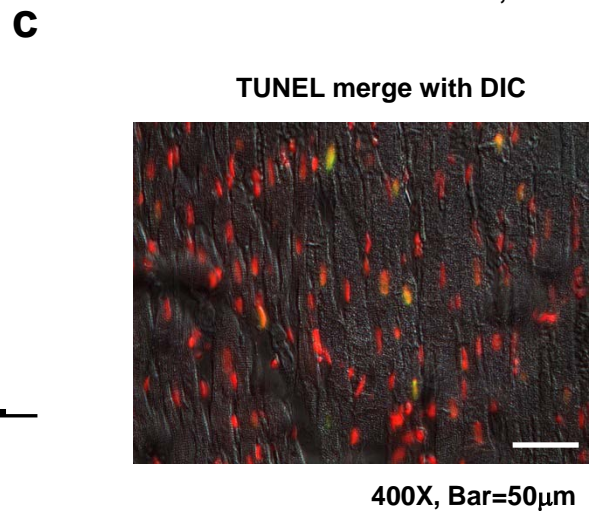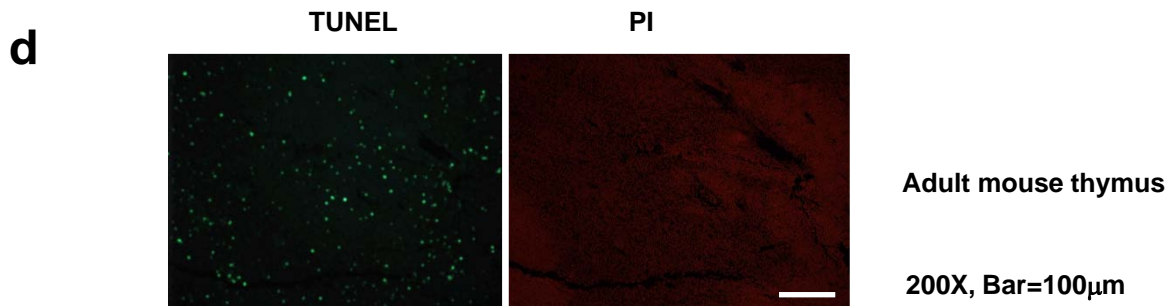

Supplemental Figure 2. SAHA decreases apoptosis by TUNEL.

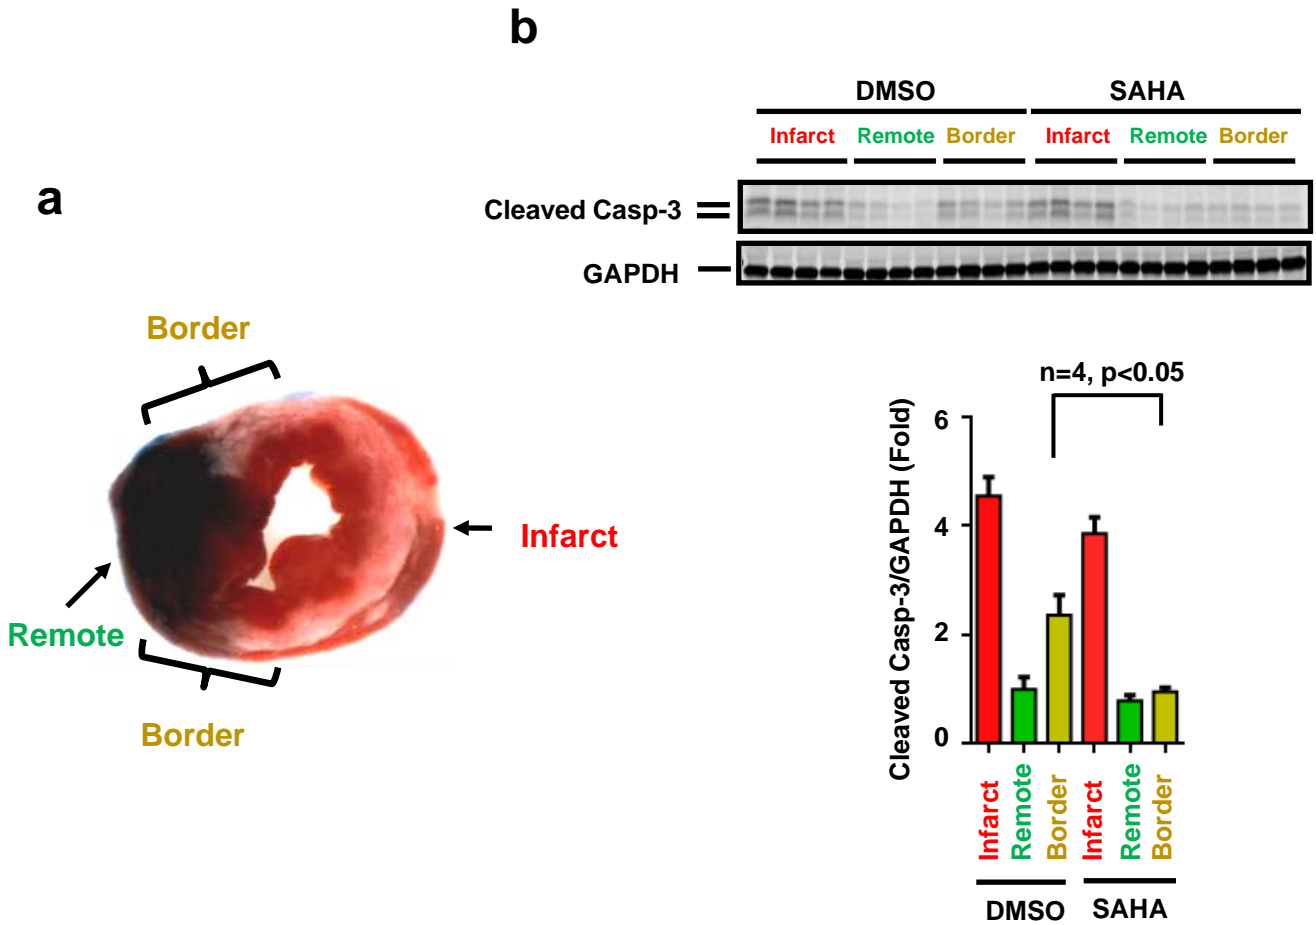

Supplemental Figure 3. SAHA decreased apoptosis in the infarct border zone as measured by cleaved caspase-3.

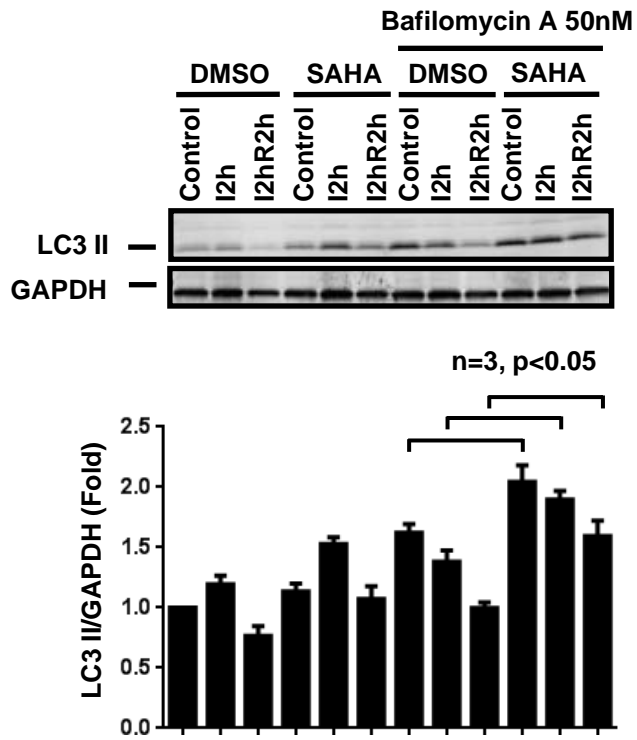

**Supplemental Figure 4. SAHA induces autophagic flux in adult rat ventricular myocytes subjected to simulated IR**

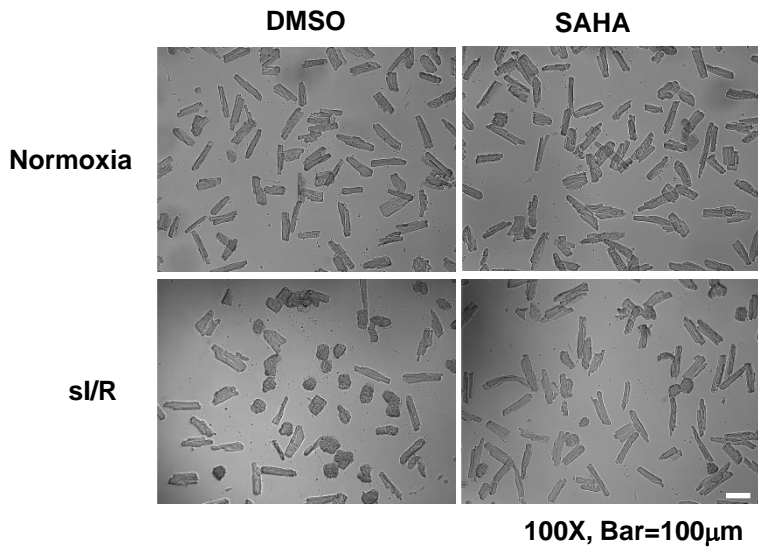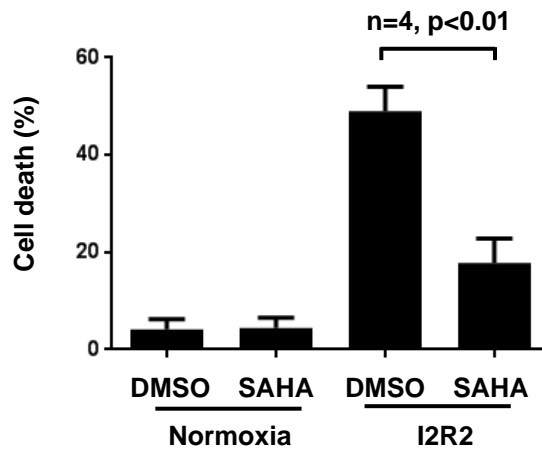

**Supplemental Figure 5. SAHA protects ARVMs from cell death after simulated IR**

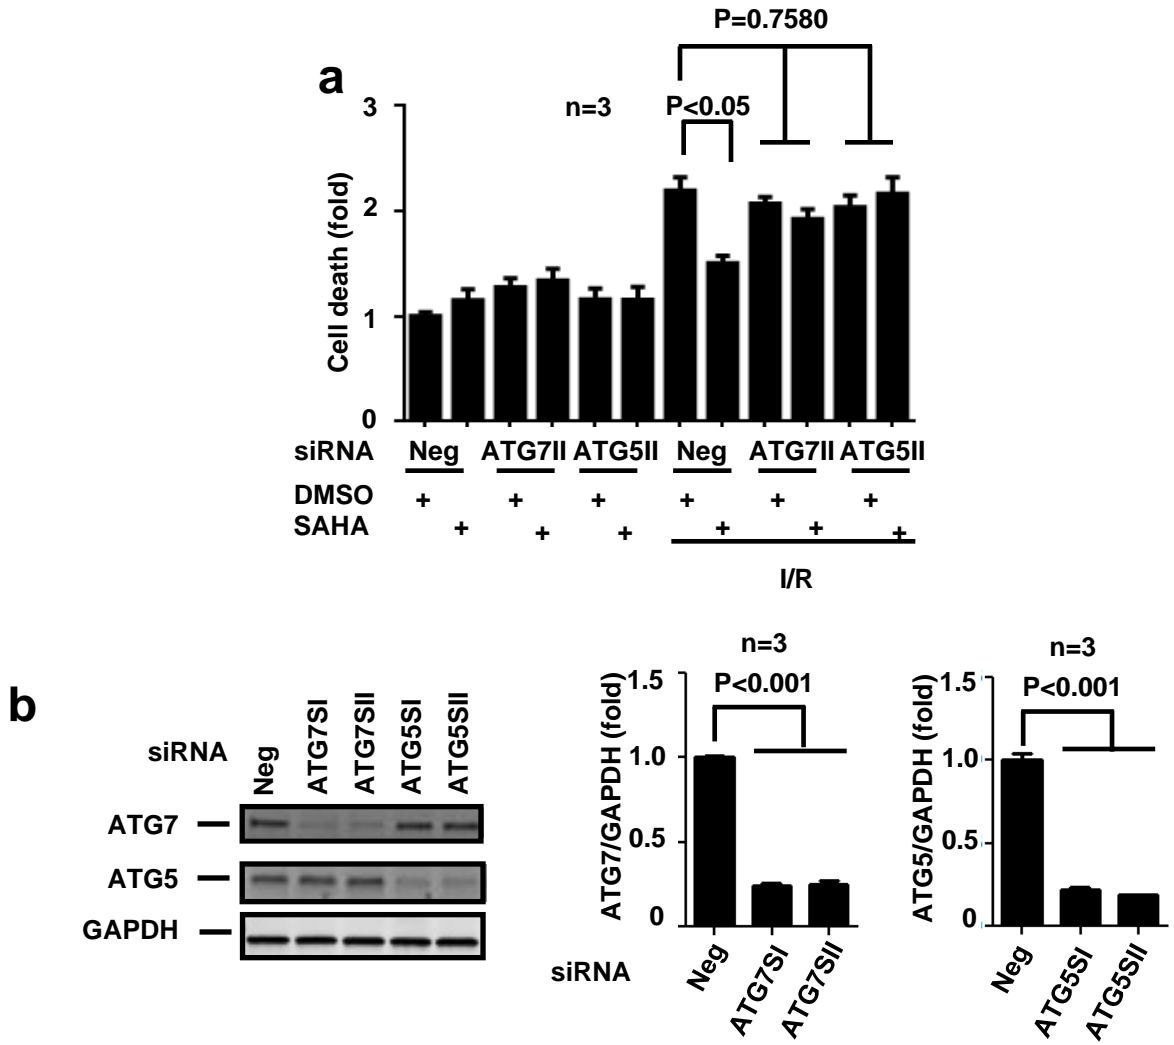

Supplemental Figure 6. SAHA's cardioprotective effects are dependent on autophagic flux as tested using a second, sequence-independent set of ATG7 and ATG5 siRNAs.

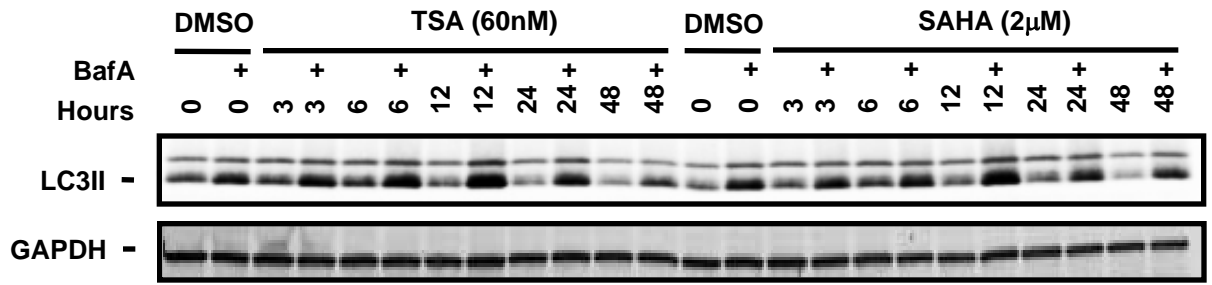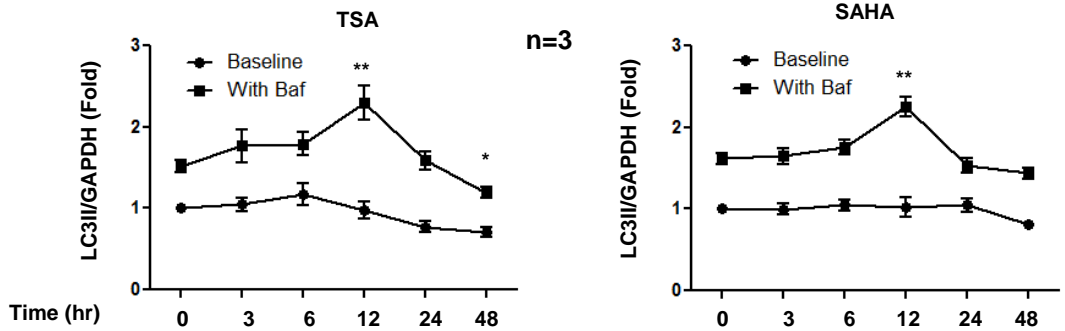

**Supplemental Figure 7. TSA and SAHA induce autophagic flux at early time points, and prolonged TSA treatment reduces autophagic flux in serum-free conditions.**



|                          | Study Type | n                 | Shapiro-Wilk normality                   | Test used                                                                | Significance                                                      |
|--------------------------|------------|-------------------|------------------------------------------|--------------------------------------------------------------------------|-------------------------------------------------------------------|
| <b>Figure 1bcd</b>       | Mouse      | 11                | Passed                                   | Parametric Unpaired t test                                               | p<0.05 DMSO vs TSA                                                |
| <b>Figure 1e</b>         | Mouse      | 10                | Passed                                   | Parametric Repeated measure ANOVA                                        | p<0.05 DMSO vs TSA at all four time points                        |
| <b>Figure 1ghi</b>       | Mouse      | 6-7               | SAHA 30 passed, DMSO, SAHA50 n too small | Non-parametric Anova Kruskal-Wallis test                                 | IF/AAR, FS p<0.05 DMSO vs SAHA50                                  |
| <b>Figure 3bcdfg</b>     | Rabbit     | 7                 | All group passed                         | Parametric ANOVA with post Tukey's multiple comparisons test             | IF/AAR, IF/LV and FS p<0.05 DMSO vs SAHA pre and SAHA reper       |
| <b>Figure5a</b>          | Molecular  | 4                 | n too small                              | Parametric ANOVA with post Tukey's multiple comparisons test             | p<0.05 SAHA border vs DMSO border                                 |
| <b>Figure5d</b>          | Molecular  | 3-5               | n too small                              | Parametric ANOVA with post Tukey's multiple comparisons test             | p<0.05 Autophagosome Autolysosome DMSO vs SAHA reper and SAHA pre |
| <b>Figure6a</b>          | Molecular  | 3 (triplicate 9)  | All group passed                         | Parametric ANOVA with post Tukey's multiple comparisons test             | p<0.05 DMSO vs SAHA                                               |
| <b>Figure6b</b>          | Molecular  | 3                 | n too small                              | Parametric ANOVA with post Tukey's multiple comparisons test             | p<0.05 DMSO vs SAHA                                               |
| <b>Figure6c</b>          | Molecular  | 3                 | n too little                             | Parametric ANOVA with post Tukey's multiple comparisons test             | p<0.05 DMSO vs SAHA                                               |
| <b>Figure6d</b>          | Molecular  | 3 (triplicate 9)  | All group passed                         | Parametric ANOVA with post Tukey's multiple comparisons test             | p<0.05 DMSO vs SAHA                                               |
| <b>Figure6e</b>          | Molecular  | 4                 | n too small                              | Parametric ANOVA with post Tukey's multiple comparisons test             | p<0.05 Control vs ATG7 and ATG5                                   |
| <b>Figure7a</b>          | Molecular  | 3                 | n too small                              | Parametric ANOVA with post Tukey's multiple comparisons test             | p<0.05 DMSO vs SAHA                                               |
| <b>Figure7b</b>          | Molecular  | 3 (triplicate 9)  | All group passed                         | Parametric ANOVA with post Tukey's multiple comparisons test             | p<0.05 hypo DMSO neg vs hypo SAHA neg                             |
| <b>Supp Figure 1ab</b>   | Rabbit     | 3-6               | n too small                              | Non-Parametric Mann Whitney t test between DMSO and SAHA 150             | p<0.05 DMSO vs SAHA150                                            |
| <b>Supp Figure 1cd</b>   | Rabbit     | 5-7               | n too small                              | Non-Parametric Kruskal-Wallis test with Dunn's multiple comparisons test | p<0.05 DMSO vs SAHA reper and SAHA pre                            |
| <b>Supp Figure 1efgh</b> | Rabbit     | 12-14             | All group passed                         | Parametric ANOVA with post Tukey's multiple comparisons test             | p<0.05 DMSO vs SAHA reper and SAHA pre                            |
| <b>Supp Figure 2</b>     | Molecular  | 3                 | n too small                              | Parametric ANOVA with post Tukey's multiple comparisons test             | p<0.05 DMSO border vs SAHA border                                 |
| <b>Supp Figure 3</b>     | Molecular  | 3                 | n too small                              | Parametric ANOVA with post Tukey's multiple comparisons test             | p<0.05 DMSO border vs SAHA border                                 |
| <b>Supp Figure 4</b>     | Molecular  | 3                 | n too small                              | Parametric ANOVA with post Tukey's multiple comparisons test             | p<0.05 DMSO vs SAHA across neg, I2 and I2R2                       |
| <b>Supp Figure 5</b>     | Molecular  | 4 (triplicate 12) | All group passed                         | Parametric ANOVA with post Tukey's multiple comparisons test             | p<0.05 DMSO vs SAHA after I2R2                                    |
| <b>Supp Figure 6a</b>    | Molecular  | 3 (triplicate 9)  | All group passed                         | Parametric ANOVA with post Tukey's multiple comparisons test             | p<0.05 DMSO vs SAHA                                               |
| <b>Supp Figure 6b</b>    | Molecular  | 3                 | n too small                              | Parametric ANOVA with post Tukey's multiple comparisons test             | p<0.05 Neg vs ATG7 and ATG5                                       |
| <b>Supp Figure 7</b>     | Molecular  | 3                 | n too small                              | t test between each time point to time 0h                                | p<0.05 TSA time 12h and 48h vs time 0h, SAHA 12h vs 0h            |

**Supplemental Table 1. Experiment paradigm and statistical methods used**

|                  | <b>Study Type</b>          | <b>n</b> | <b>Shapiro-Wilk normality</b>            | <b>Non-parametric Test used</b>                                | <b>Significance (exact p value)</b>                                         |
|------------------|----------------------------|----------|------------------------------------------|----------------------------------------------------------------|-----------------------------------------------------------------------------|
| <b>Figure 1b</b> | Mouse (TSA infarct size)   | 11       | Passed                                   | Mann Whitney test                                              | IF/AAR, DMSO vs TSA, p=0.0128                                               |
| <b>Figure 1e</b> | Mouse (TSA FS)             | 10       | Passed                                   | Friedman test, with Dunn's post test of two groups             | FS, DMSO vs TSA, Day1 p=0.0394, Day3 p=0.0052, Day7 p=0.0001, Day14 p=0.024 |
| <b>Figure 1g</b> | Mouse (SAHA infarct size)  | 6-7      | SAHA 30 passed, DMSO, SAHA50 n too small | Anova Kruskal-Wallis test, with Dunn's post test of two groups | IF/AAR, DMSO vs SAHA50, p=0.0179                                            |
| <b>Figure 1i</b> | mouse (SAHA FS)            | 6-7      | SAHA 30 passed, DMSO, SAHA50 n too small | Anova Kruskal-Wallis test, with Dunn's post test of two groups | Post IR FS, DMSO vs SAHA Pre, p=0.0381                                      |
| <b>Figure 3b</b> | Rabbit (SAHA infarct size) | 7        | All group passed                         | Anova Kruskal-Wallis test, with Dunn's post test of two groups | IF/AAR, DMSO vs SAHA Pre, p=0.0015, DMSO vs SAHA Reper, p=0.0423            |
| <b>Figure 3f</b> | Rabbit (SAHA FS)           | 7        | All group passed                         | Anova Kruskal-Wallis test, with Dunn's post test of two groups | Post IR FS, DMSO vs SAHA Pre, p=0.0083, DMSO vs SAHA Reper, p=0.0025        |

**Supplemental Table 2. Non-parametric statistical analyses of all animal studies**

## **Supplemental Figure Legends**

**Supplemental Figure 1. SAHA reduces infarct size in rabbit I/R model.** **a.** SAHA pretreatment reduced infarct size normalized to area at risk (IF/AAR) as determined by TTC staining (n=3-6, p<0.05). All rabbits were subjected to I/R (30 min/24 hour). **b.** There were no significant differences in AAR among groups. **c.** In a non-randomized cohort, both SAHA pretreatment and reperfusion-only treatment reduced IF/AAR (n=5-7, p<0.01). **d.** There were no significant differences in AAR among groups. **e.** Data from both randomized and non-randomized cohorts are combined. SAHA reduced IF/AAR significantly (n=12-14, p<0.001). **f.** There were no significant differences in AAR among groups. **g.** Data from both randomized and non-randomized cohorts are combined. SAHA partially preserved systolic function quantified as %FS (n=12-14, p<0.001). **h.** Declines in contractile performance after I/R, measured as %FS, were significantly blunted in the SAHA treatment group (n=12-14, p<0.001).

**Supplemental Figure 2. SAHA decreases apoptosis by TUNEL.** **a.** TUNEL staining of three tissue zones: infarct zone, border zone, and remote zone. Green, TUNEL-positive nuclei, Red, PI staining of nuclei. Rabbits were subjected to I/R (30 min/2 hour). **b.** Quantification of TUNEL-positive nuclei. SAHA treatment significantly reduced TUNEL-positive nuclei in the I/R border zone (n=3, p<0.01). **c.** Merged image of DIC and TUNEL staining reveals that TUNEL-positive cells are predominantly within striated myocytes. **d.** Adult mouse thymus was used as a positive control for TUNEL staining.

**Supplemental Figure 3. SAHA decreased apoptosis in the infarct border zone as measured by cleaved caspase-3.** **a.** Rabbit myocardium samples were harvested as depicted. Red: infarct zone, Green: remote zone, Yellow: border zone. **b. Upper:** Immunoblot analysis of cleaved caspase 3. **Lower:** Quantification of cleaved caspase 3 revealed that levels were significantly lower in the SAHA-treated group (n=4, p<0.05).

**Supplemental Figure 4. SAHA induces autophagic flux in adult rat ventricular myocytes subjected to simulated IR.** **Upper:** Western blots. **Lower:** mean data. SAHA pretreatment induced autophagic flux in ARVMs at baseline and after simulated ischemia 2hr (I2h). Furthermore, SAHA treatment exclusively at reperfusion induced autophagic flux after simulated ischemia (2hr) plus reperfusion (2hr) [I2R2].

**Supplemental Figure 5. . SAHA protects ARVMs from cell death after simulated IR.** SAHA treatment (2 $\mu$ M) at reperfusion reduced cell death around 60% after simulated I/R (sI/R; 2hour/2 hour) (n=4, p<0.05).

**Supplemental Figure 6. . SAHA's cardioprotective effects are dependent on autophagic flux as tested using a second, sequence-independent set of ATG7 and ATG5 siRNAs.** a. LDH cell death assays were conducted in the settings of ATG7 or ATG5 knockdown using sequence-independent siRNA constructs (ATG7II and ATG5II). Suppression of either ATG7 or ATG5 abolished SAHA's cardioprotective effects after sI/R (5 hour/1.5 hour) (n=3, p<0.05). b. RNAi knockdown of ATG7 or ATG5 using ATG7II and ATG5II siRNA. This independent set of siRNAs suppressed ATG7 and ATG5 levels as efficiently as the original set of constructs. **Left:** Western blots. **Right:** mean data.

**Supplemental Figure 7. TSA and SAHA induce autophagic flux at early time points, and prolonged TSA treatment reduces autophagic flux in serum-free conditions.** Upper: Autophagic flux measurement by LC3 II Western blot in the presence/absence of Bafilomycin A (Bfa) in NRVM treated with TSA. **Lower:** Quantification (n=3). \*\*, p<0.01; \*, p<0.05 compared with DMSO control.

## ***Supplemental Tables***

**Supplemental Table 1. Experiment paradigm and statistical methods used.** Methods employed in each figure are listed. In the animal studies, if the data did not pass criteria for normality, non-parametric analysis was performed. In the molecular studies, parametric analyses were performed throughout. The cell death assay data fulfilled normality. Statistical significance is reported if  $p < 0.05$ .

**Supplemental Table 2. Non-parametric statistical analyses of all animal studies.** As the animal sample sizes are low, and in an effort to maximize stringency, we also conducted non-parametric analyses in all animal studies. In each case, these analyses confirmed the statistical significance derived from parametric analyses.
